# Supplementary material
Source: PubMed Central journal article supplement (PMC3522792)
Supplement: NIHMS417627-supplement-1.pdf [file NIHMS417627-supplement-1.pdf]

## ***Supplementary Information***

**Psoriasis-associated variant Act1 D10N with impaired regulation by Hsp90**

# Supplementary Figure 1

**a**

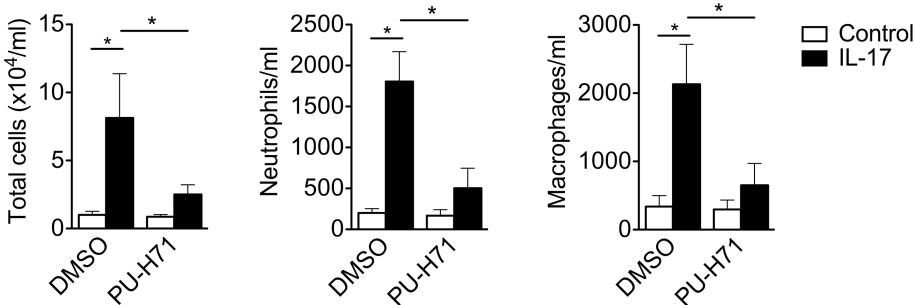

**b**

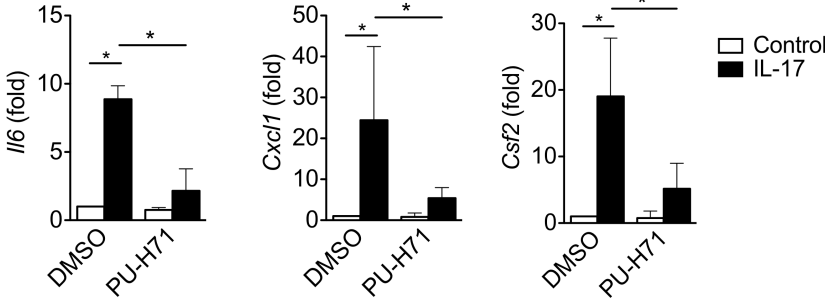

**c**

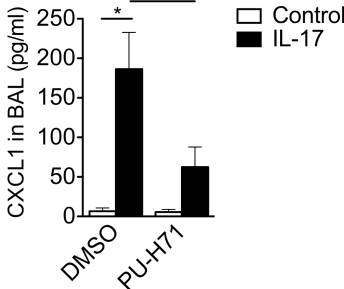

**Supplementary Figure 1.** Hsp90 inhibitor attenuates IL-17-mediated pulmonary inflammation. **(a)** Total BAL cell and differential cell counts from DMSO or PU-H71 pretreated mice (75mg/kg of inhibitor injected intraperitoneally, once daily for two days before IL-17 injection) left unchallenged (Control) or challenged for 24 h by intranasal injection of IL-17 (1 $\mu$ g). Data are graphed as mean fold induction over unchallenged  $\pm$  SEM. **(b)** Lung tissues isolated from mice treated as in **(a)** were subjected to RT-PCR analysis for *Il6*, *Cxcl1*, and *Csf2* induction. **(c)** ELISA assay for CXCL1 in BAL fluid from mice treated as in **(a)**. \* $p < 0.05$  (Student's *t*-test). Data are representative of two independent experiments with 6 mice per group.

## Supplementary Figure 2

**a**

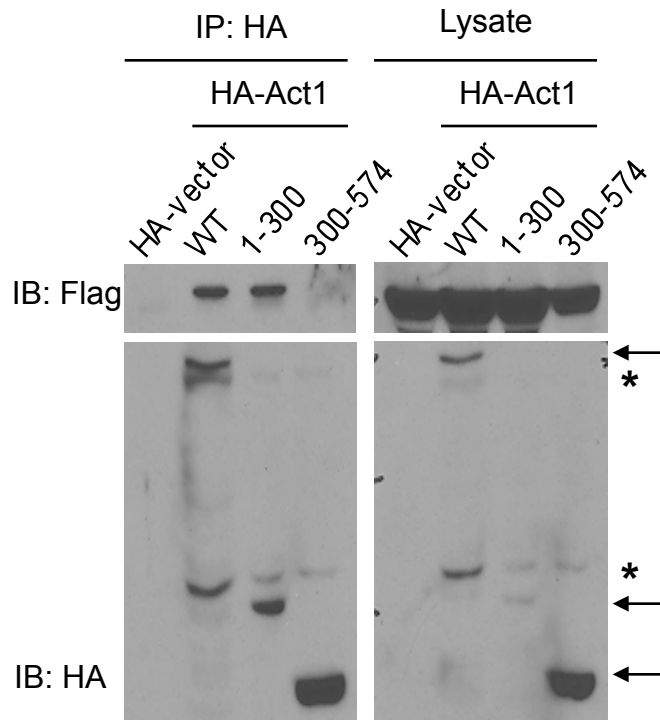

**b**

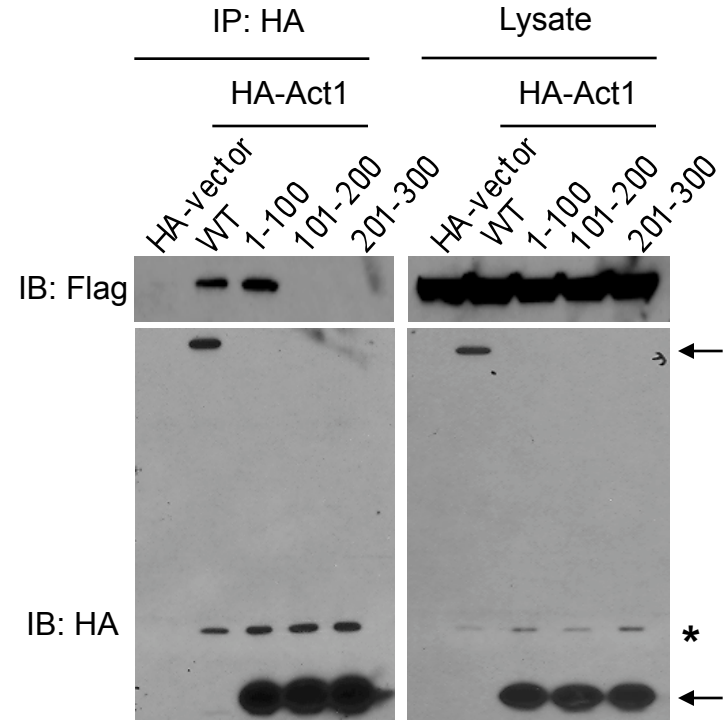

**Supplementary Figure 2.** Act1 1-100 is sufficient to interact with Hsp90. **(a)** HEK293 cells were transiently transfected with Flag-Hsp90 plus HA-vector, HA-Act1 WT, HA-Act1 1-300, or HA-Act1 300-574. Cell lysates were immunoprecipitated with anti-HA, followed by immunoblot analysis for Flag and HA. Arrows indicate Act1. Asterisks indicate non-specific bands. **(b)** HEK293 cells were transiently transfected with Flag-Hsp90 plus HA-vector, HA-Act1 WT, HA-Act1 1-100, HA-Act1 101-200, or HA-Act1 201-300. Cell lysates were immunoprecipitated with anti-HA, followed by immunoblot analysis for Flag and HA. Arrows indicate Act1. Asterisks (\*) denote none-specific bands. Data are representative of two independent experiments.

### Supplementary Figure 3

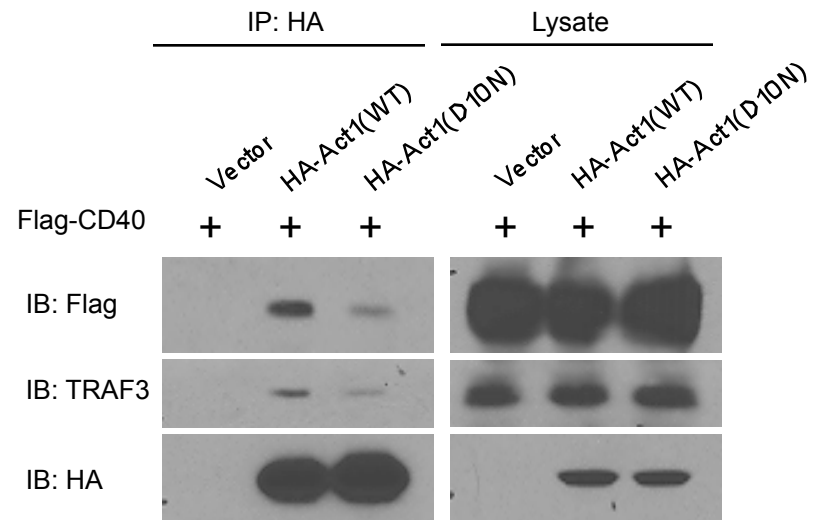

**Supplementary Figure 3.** Loss of interaction between Act1 (D10N) and CD40. HEK293 cells were transiently transfected with Flag-CD40 plus HA-vector, HA-Act1 WT or HA-Act1 (D10N). Cell lysates were immunoprecipitated with anti-HA, followed by immunoblot analysis for Flag, TRAF3 and HA. Data are representative of two independent experiments.

# Supplementary Figure 4

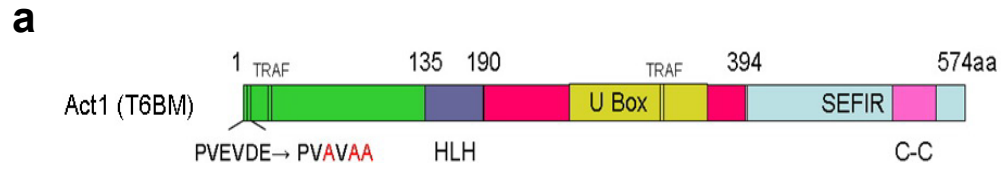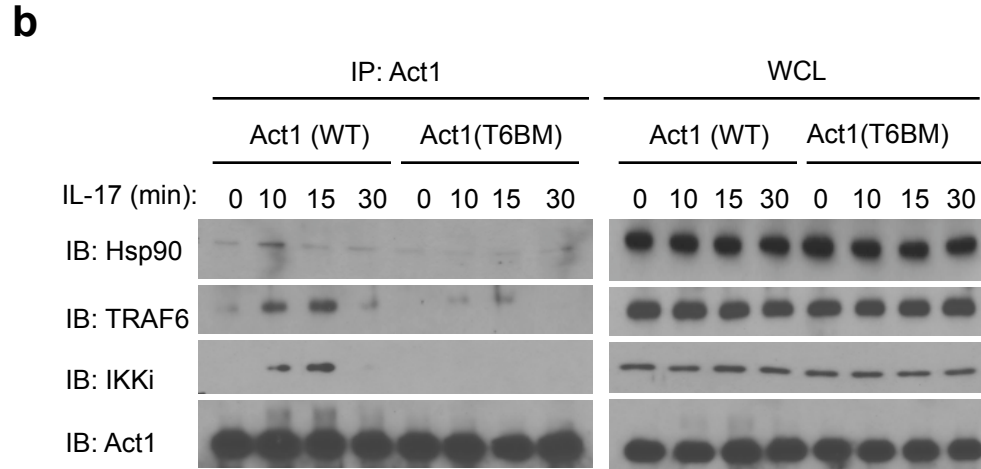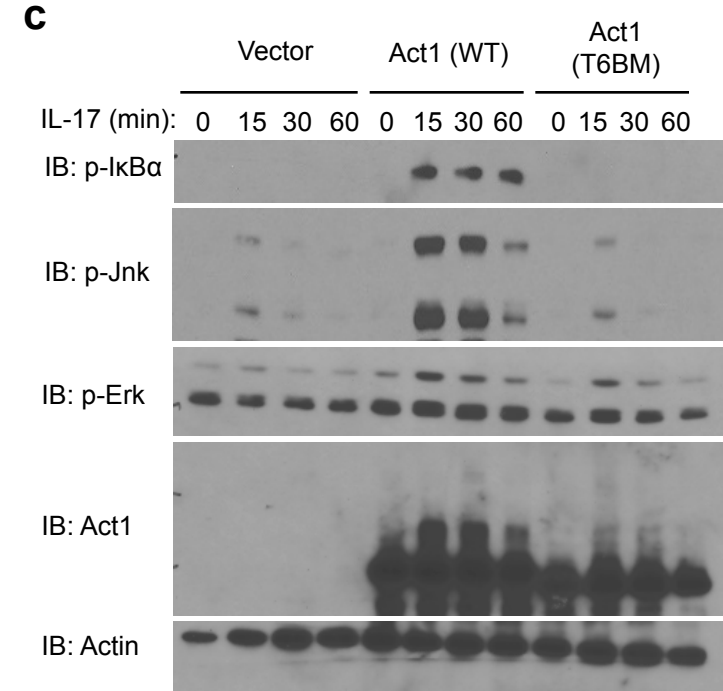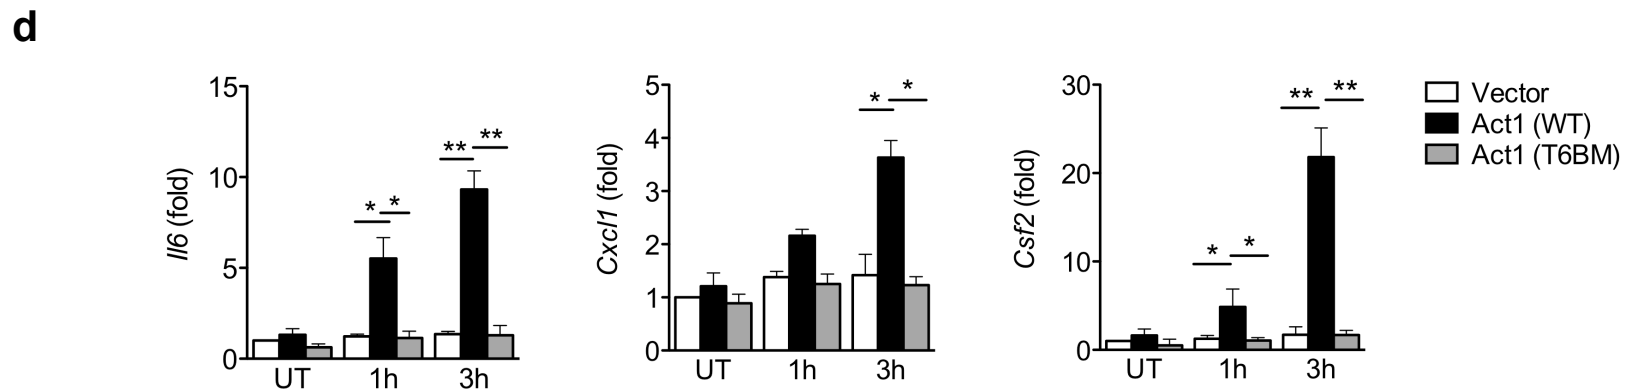

**Supplementary Figure 4.** Act1 (T6BM) is a loss-of-function mutant. **(a)** Schematics of Act1 (T6BM) mutation (PVEVDE→ PVAVAA). **(b)** *Act1*<sup>-/-</sup> MEFs transduced with Act1 (WT) or Act1 (T6BM) were treated with IL-17 (50 ng/ml) for the indicated times. Cell lysates were immunoprecipitated with anti-Act1, followed by immunoblot analysis for Hsp90, TRAF6, IKKi and Act1. **(c)** *Act1*<sup>-/-</sup> MEFs transduced vector, Act1 (WT) or Act1 (T6BM) were treated with IL-17 (50 ng/ml) for the indicated times, followed by immunoblot analysis. **(d)** *Act1*<sup>-/-</sup> MEFs transduced as in **(c)** were treated with IL-17 (50 ng/ml) for the indicated times followed by RT-PCR analysis for *Il6*, *Cxcl1* and *Csf2* induction. Untreated (UT). \**p* < 0.05, \*\**p* < 0.01 (Student's *t*-test). Data are representative of three independent experiments.

## Supplementary Figure 5

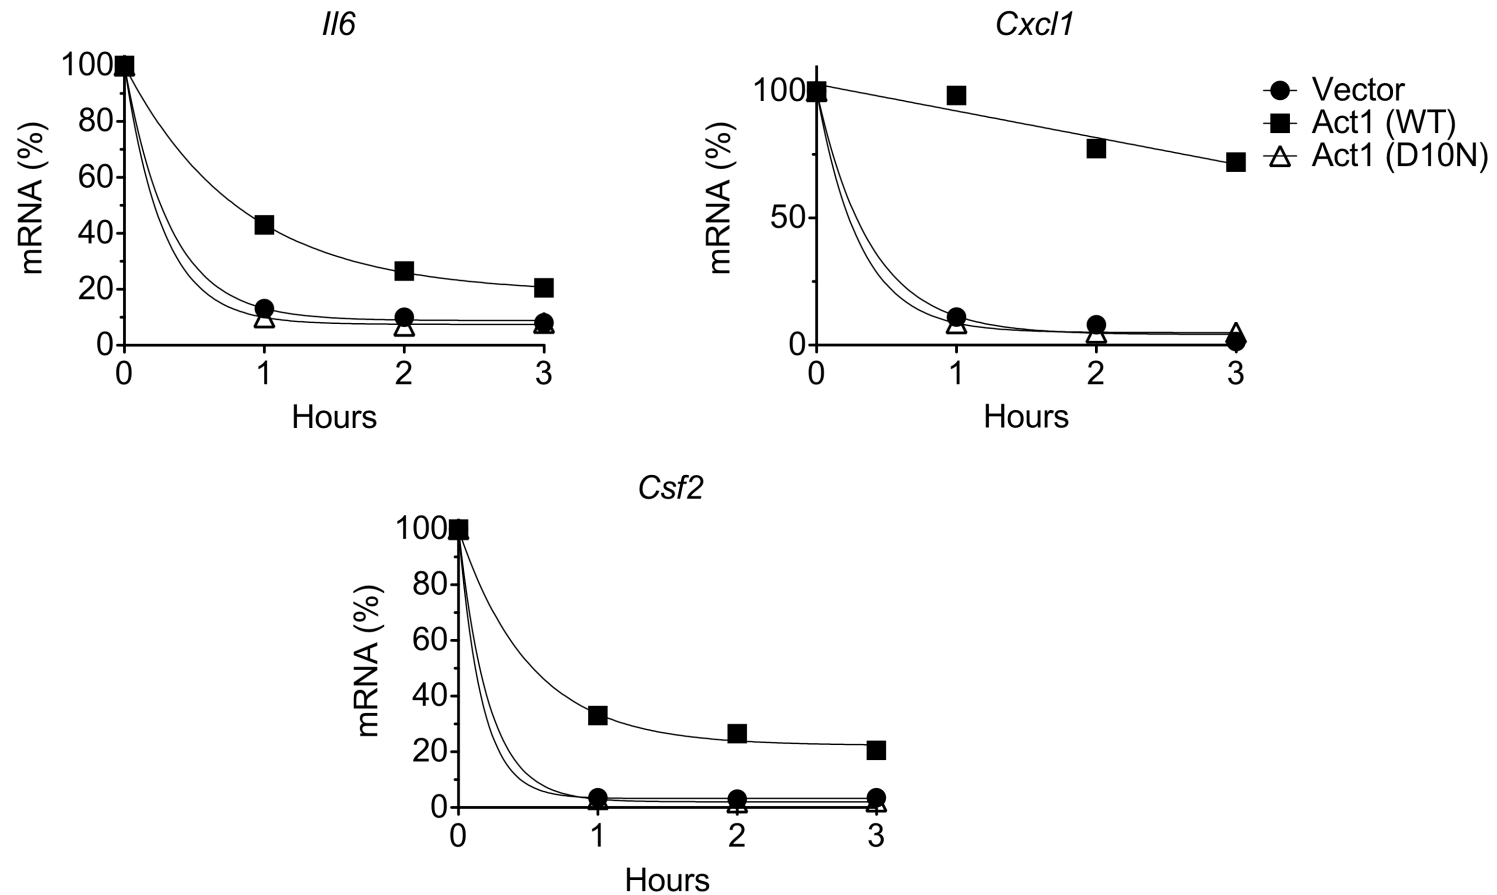

**Supplementary Figure 5.** Loss of mRNA stability in Act1 (D10N). *Act1*<sup>-/-</sup> MEFs were transduced with vector, Act1 (WT), or Act1 (D10N) and pretreated with TNF (10ng/ml) for 1 hour. Cells were then treated with IL-17 (50ng/ml) and actinomycin D (ActD) (5µg/ml) for the indicated times followed by RT-PCR analysis for *Il6*, *Cxcl1*, and *Csf2* expression. Gene expression prior to IL-17 and ActD treatment was defined as 100%. mRNA stability is defined as the percentage of mRNA that remains after Act1D treatment. Data are one representative of three independent experiments.



## Supplementary Figure 6

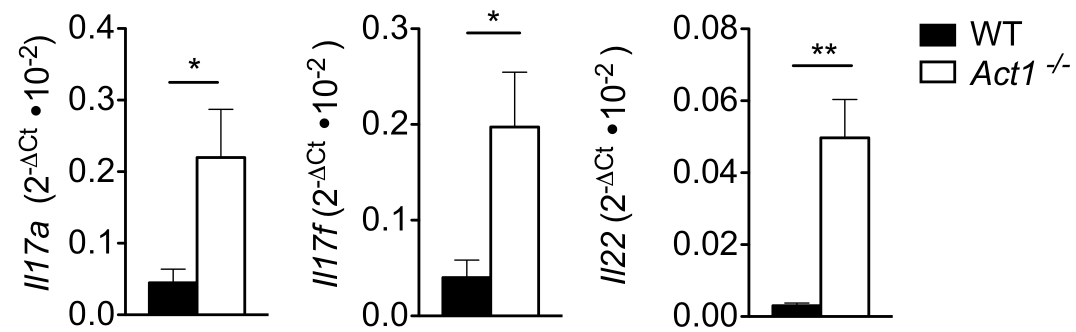

**Supplemental Figure 6.** RT-PCR analysis of *Il17a*, *Il17f*, and *Il22* transcripts in the lymph nodes of 6 weeks old *Act1* WT or *Act1*<sup>-/-</sup> mice (n= 5 per group). \**p* < 0.05, \*\**p* < 0.01 (Student's *t*-test). Data are from three independent experiments.

## Supplementary Figure 7

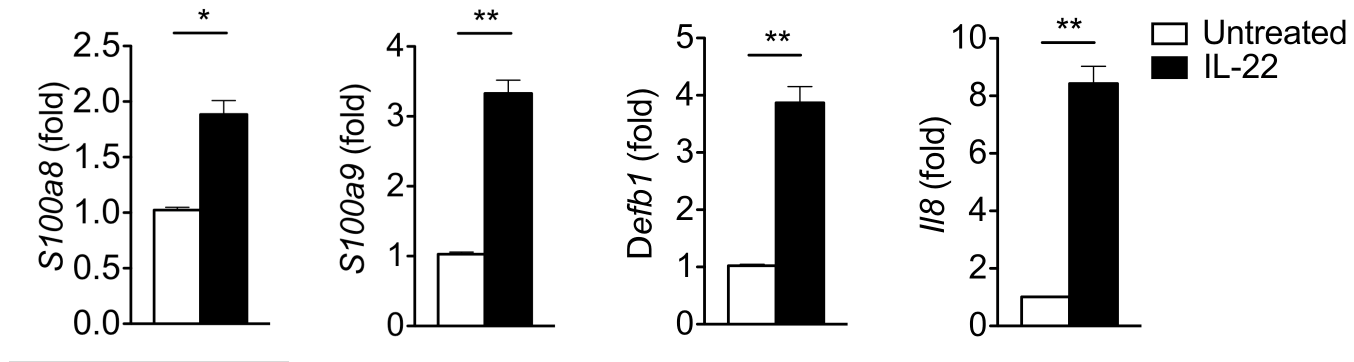

**Supplementary Figure 7.** RT-PCR analysis of *S100a8*, *S100a9*, *Defb1* and *I18* expression in human keratinocytes treated with IL-22 (50ng/ml) for three hours. Data are presented as fold induction over untreated. \* $p < 0.05$ , \*\* $p < 0.01$  (Student's *t*-test). Data are representative of two experiments.

# Supplemental Figure 8

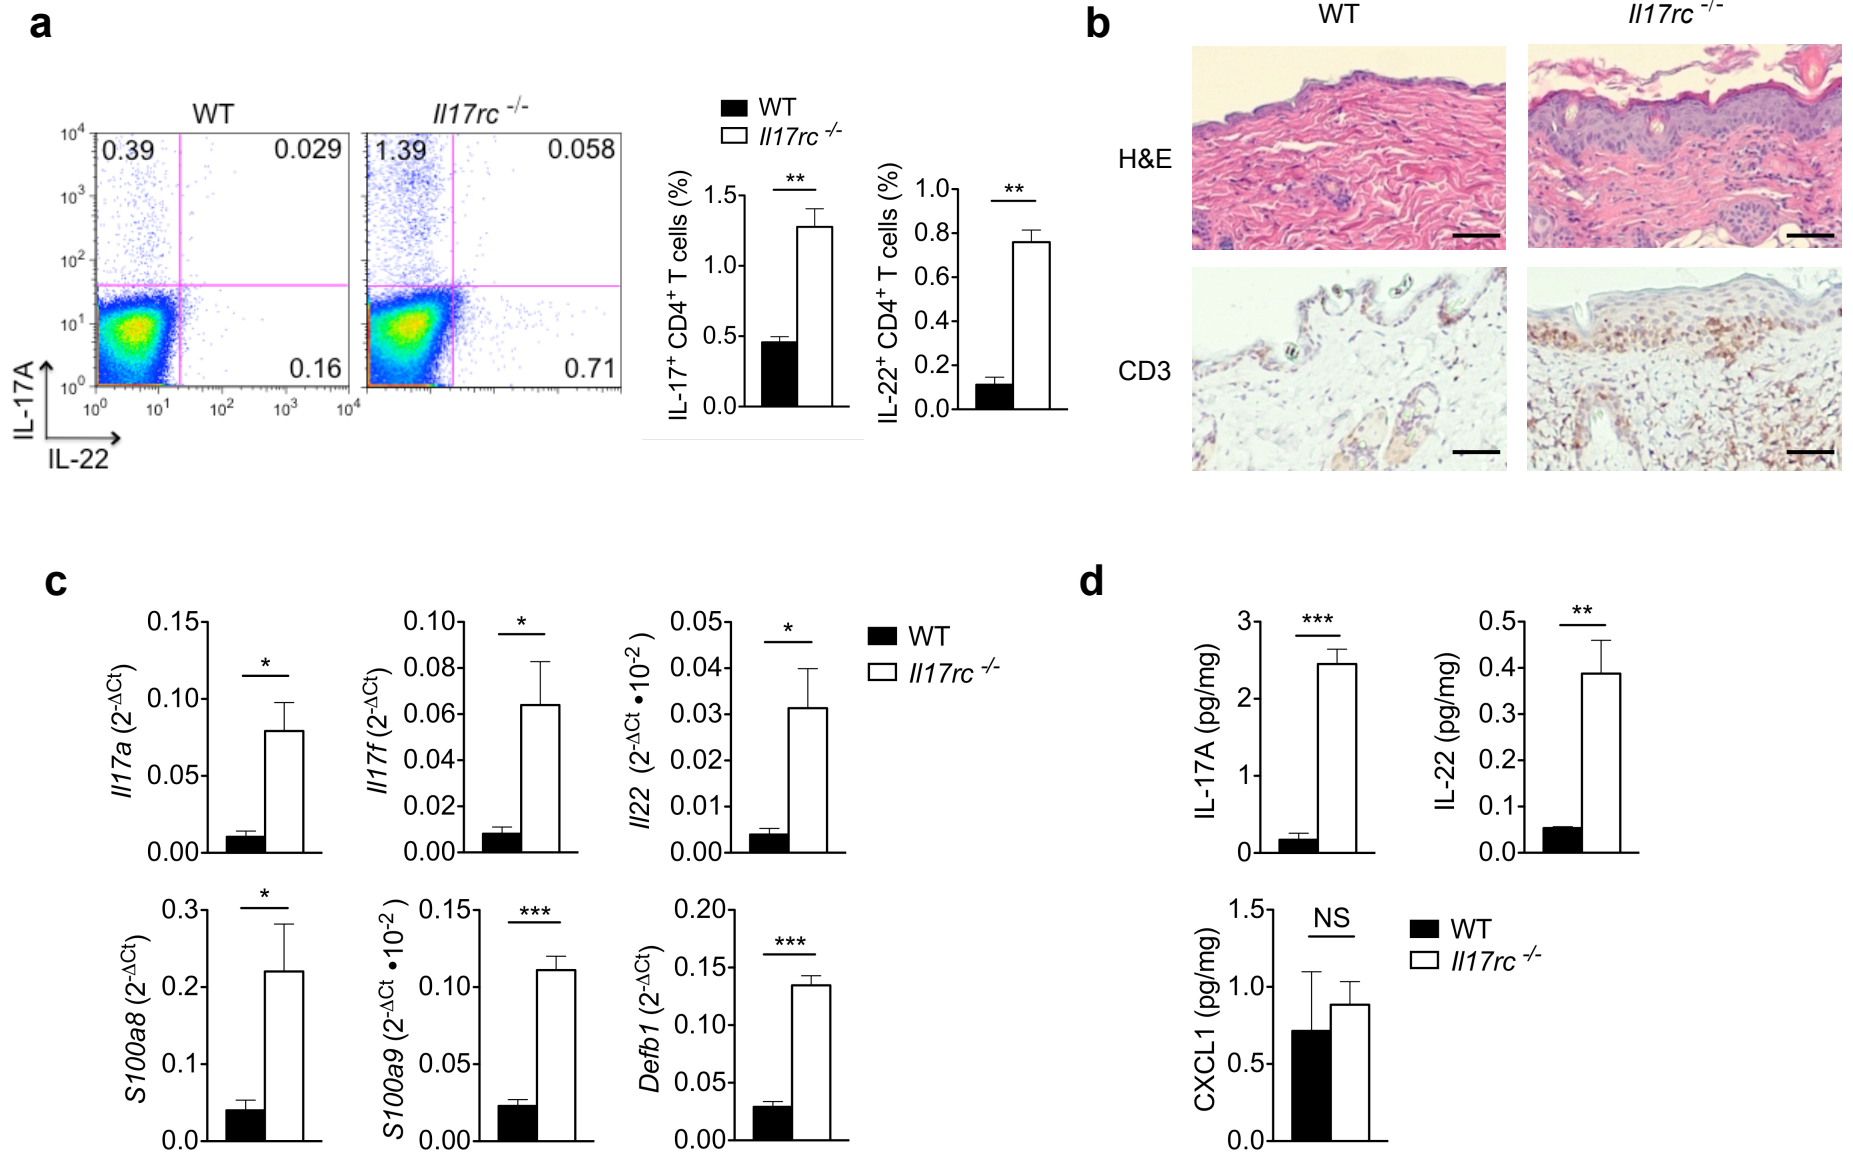

# Supplemental Figure 8

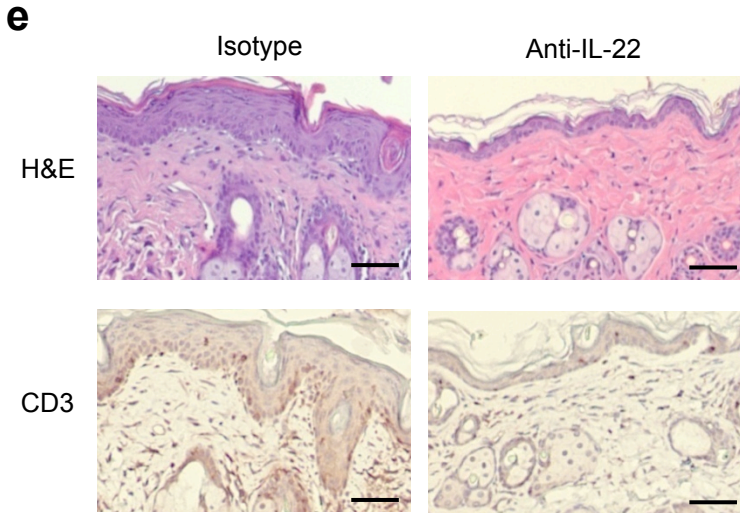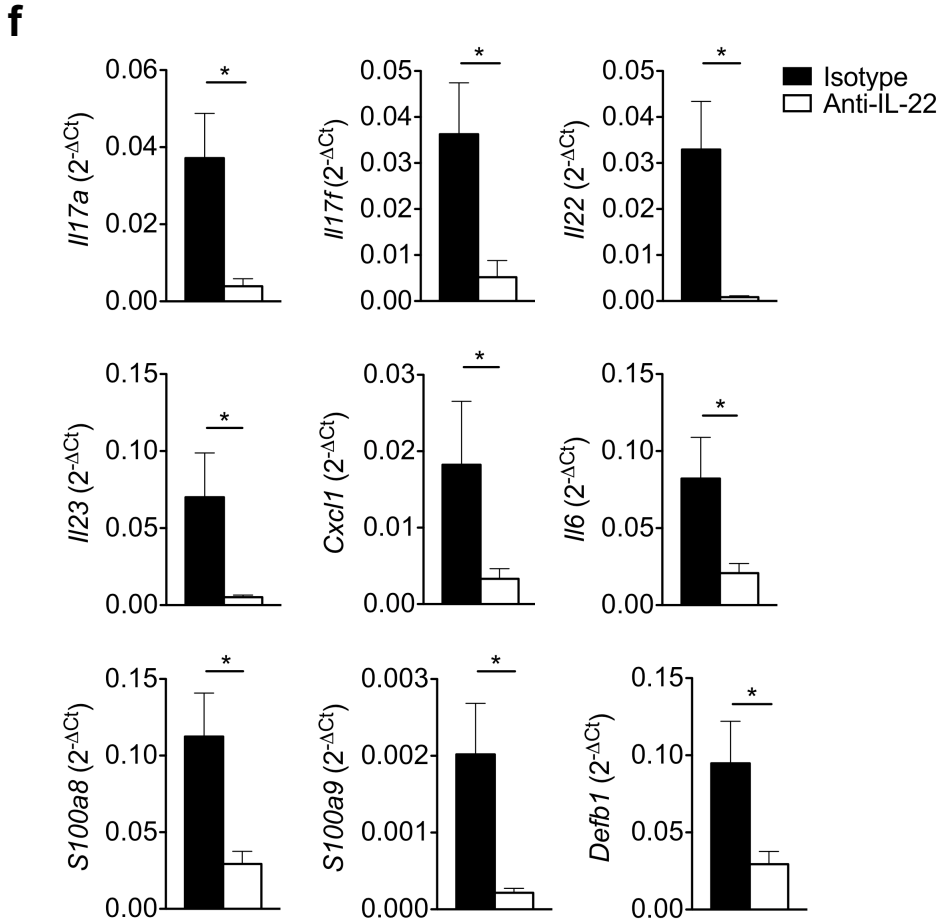

**Supplementary Figure 8.** Skin inflammation in *Il17rc*<sup>-/-</sup> mice. **(a)** Cells were isolated from the lymph nodes of WT or *Il17rc*<sup>-/-</sup> mice and stimulated with PMA and ionomycin for 5 hours followed by intracellular staining for IL-17 and IL-22. Flow plots are gated on CD4<sup>+</sup> T cells. Right graph indicates the percentage of IL-17<sup>+</sup> and IL-22<sup>+</sup> CD4<sup>+</sup> T cells. **(b)** Skin sections from WT or *Il17rc*<sup>-/-</sup> mice stained with H&E or with anti-CD3. Scale bar indicates 50µm. **(c)** RT-PCR analysis of gene transcripts the skin of WT or *Il17rc*<sup>-/-</sup> mice. Data are graphed as mean 2<sup>-ΔCt</sup> ± SEM. **(d)** Cytokine production by skin infiltrates isolated from the skin of WT and *Il17rc*<sup>-/-</sup> mice. Cytokine production was normalized to tissue weight. **(e)** Skin sections from isotype or anti-IL-22-treated *Il17rc*<sup>-/-</sup> mice were stained with hematoxylin and eosin or with anti-CD3. Scale bar indicates 50µm. **(f)** RT-PCR analysis of cytokine transcripts in the skin of isotype or anti-IL-22-treated *Il17rc*<sup>-/-</sup> mice. \**p* < 0.05, \*\**p* < 0.01, \*\*\**p* < 0.005, not significant (NS) (Student's *t*-test). Data are representative of two independent experiments.

## Supplementary Figure 9

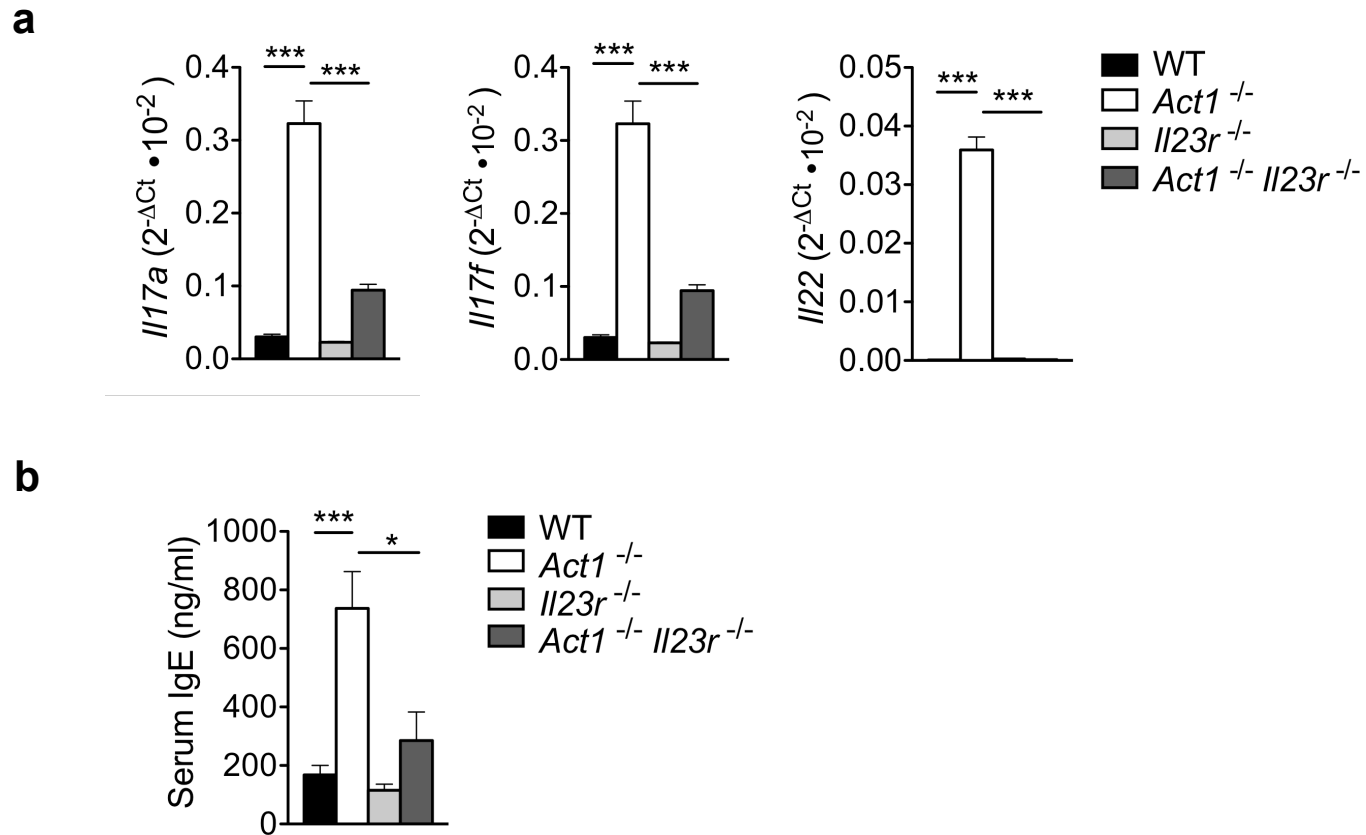

**Supplementary Figure 9.** Loss of IL-23 signaling attenuates the hyper  $T_H17$  response in *Act1*<sup>-/-</sup> mice. **(a)** RT-PCR analysis of *Il17a*, *Il17f*, and *Il22* transcripts in the lymph nodes of 6 weeks old WT, *Act1*<sup>-/-</sup>, *Il23r*<sup>-/-</sup>, and *Act1*<sup>-/-</sup> *Il23r*<sup>-/-</sup> mice. **(b)** Serum IgE levels of WT, *Act1*<sup>-/-</sup>, *Il23r*<sup>-/-</sup>, and *Act1*<sup>-/-</sup> *Il23r*<sup>-/-</sup> mice at 6mos of age. \* $p < 0.05$ , \*\*\* $p < 0.005$  (Student's *t*-test). Data are representative of two independent experiments.
